# Supplementary material for: The effect of nitrogen doping on mercury oxidation/chemical adsorption on the CuCo2O4(110) surface: a molecular-level description
Source: Royal Society of Chemistry journal article supplement (doi:10.1039/c4cp01362j), 2014-01-01
Supplement: c4cp01362j1.pdf [file c4cp01362j1.pdf]

Table 1

The  $\text{CuCo}_2\text{O}_4$  crystal parameter comparison of computed results and experimental results

|                           | Coarse  | Medium  | Fine    | Shima <sup>1</sup> | Yogesh<br>Sharma <sup>2</sup> | $\text{Cu}_{0.95}\text{Co}_{2.05}\text{O}_4$ |
|---------------------------|---------|---------|---------|--------------------|-------------------------------|----------------------------------------------|
| $\text{CuCo}_2\text{O}_4$ |         |         |         |                    |                               |                                              |
| a                         | 8.14118 | 8.14118 | 8.14118 | 8.154              | 8.129                         | 8.133                                        |
| V                         | 539.588 | 539.588 | 539.588 |                    |                               | 537.96                                       |
| Density                   | 6.04179 | 6.04179 | 6.04179 |                    |                               | 6.053                                        |
| HgO                       |         |         |         |                    |                               |                                              |
| Hg-O                      | 1.94 Å  | 1.95 Å  | 1.95 Å  |                    |                               | 2.05 Å <sup>3</sup>                          |

<sup>1</sup> M. Shimada, Mater. Res. Bull. 10 (1975) 733.

<sup>2</sup> N.S. Yogesh Sharma, G.V. Subba Rao, V. R. Chowdari, J. Power Sour. 173 (2007) 495.

<sup>3</sup> M. Filatov, D. Cremer, ChemPhysChem 5 (2004) 1547.

TABLE 2. The adsorption energy of mercury on different N-doped slab

|                                           | $\Delta E_{\text{ad}}$<br>(eV) | $\Delta E_{\text{HgO}}$<br>(eV) | $E_a$<br>(eV) | $E_a^{-1}$<br>(eV) |
|-------------------------------------------|--------------------------------|---------------------------------|---------------|--------------------|
| $\text{CuCo}_2\text{O}_4(110)$            | 0.28                           | 2.61                            | 0.85          | 0.28               |
| $\text{CuCo}_2\text{O}_3\text{Nb}(110)$   | 0.22                           | 2.3                             | 0.76          | 0.21               |
| $\text{CuCo}_2\text{O}_2\text{NbNb}(110)$ | 0.16                           | 2.08                            | 0.69          | 0.13               |

Table 3

The occupancy and hybridization of the calculated natural bond orbital (NBO) for different adsorption system

|                                                            | <b>NBO</b>                            | <b>Occupancy</b> | <b>Hybrids</b>                                                                        |
|------------------------------------------------------------|---------------------------------------|------------------|---------------------------------------------------------------------------------------|
| Hg+CuCo <sub>2</sub> O <sub>4</sub> (110)                  | LP(6)Hg                               | 1.99997          | 6s                                                                                    |
| Hg-CuCo <sub>2</sub> O <sub>4</sub> (110)                  | BD(1)Co <sub>1</sub> -Hg              | 1.92358          | 0.2698(sp <sup>0.32</sup> d <sup>0.51</sup> ) <sub>Co</sub> +0.9629(6s) <sub>Hg</sub> |
|                                                            | BD*(1)Co <sub>1</sub> -Hg             | 0.18465          | 0.9629(sp <sup>0.32</sup> d <sup>0.51</sup> ) <sub>Co</sub> -0.2698 (s) <sub>Hg</sub> |
| Hg-CuCo <sub>2</sub> O <sub>4</sub> N <sub>b</sub> (110)   | BD(1)Co <sub>1</sub> -Hg( $\alpha$ )  | 0.96348          | 0.2774 (sp <sup>0.35</sup> d <sup>0.69</sup> ) <sub>Co</sub> +0.9608(S) <sub>Hg</sub> |
|                                                            | LP(6)Hg( $\beta$ )                    | 0.91818          | 6s                                                                                    |
|                                                            | BD*(1)Co <sub>1</sub> -Hg( $\alpha$ ) | 0.13659          | 0.9608(sp <sup>0.35</sup> d <sup>0.69</sup> ) <sub>Co</sub> -0.2774(s) <sub>Hg</sub>  |
| Hg-CuCo <sub>2</sub> O <sub>4</sub> N <sub>w</sub> (110)   | LP(6)Hg( $\alpha$ )                   | 0.92406          | 6s                                                                                    |
|                                                            | LP(6)Hg( $\beta$ )                    | 0.79850          | 6s                                                                                    |
| Hg-CuCo <sub>2</sub> O <sub>4</sub> N <sub>s</sub> (110)   | LP(6)Hg( $\alpha$ )                   | 0.88516          | 6s                                                                                    |
|                                                            | BD(1)Co <sub>1</sub> -Hg( $\beta$ )   | 0.96879          | 0.3156(sd <sup>0.37</sup> ) <sub>Co</sub> +0.9489(6s) <sub>Hg</sub>                   |
| Hg-CuCo <sub>2</sub> O <sub>4</sub> N <sub>bb</sub> (110)  | LP(6)Hg                               | 1.95227          | Sd <sup>0.12</sup>                                                                    |
| Hg-CuCo <sub>2</sub> O <sub>4</sub> N <sub>bs</sub> (110)  | LP(6)Hg                               | 1.77498          | 6s                                                                                    |
| Hg-CuCo <sub>2</sub> O <sub>4</sub> N <sub>bw</sub> (110)  | LP(6)Hg                               | 1.75885          | 6s                                                                                    |
| Hg-CuCo <sub>2</sub> O <sub>4</sub> N <sub>bbs</sub> (110) | LP(6)Hg( $\alpha$ )                   | 0.96306          | 6sd <sup>0.09</sup>                                                                   |
|                                                            | LP(6)Hg( $\beta$ )                    | 0.96547          | 6sd <sup>0.09</sup>                                                                   |
| Hg-CuCo <sub>2</sub> O <sub>4</sub> N <sub>bbw</sub> (110) | LP(6)Hg( $\alpha$ )                   | 0.93975          | 6s                                                                                    |
|                                                            | LP(6)Hg( $\beta$ )                    | 0.88261          | 6s                                                                                    |

Table 4

The second order perturbation stabilization energies E(2) for the systems

|                                                           | <b>Donor NBO(i)</b>                   | <b>Acceptor NBO(j)</b>                 | <b>E(2) (Kcal/mol)</b> |
|-----------------------------------------------------------|---------------------------------------|----------------------------------------|------------------------|
| Hg+CuCo <sub>2</sub> O <sub>4</sub> (110)                 |                                       |                                        |                        |
| Hg-CuCo <sub>2</sub> O <sub>4</sub> (110)                 | BD (1)Co <sub>1</sub> -O <sub>1</sub> | BD*(1)Co <sub>1</sub> -Hg              | 45.13                  |
|                                                           | BD(1)Co <sub>1</sub> -O <sub>2</sub>  | BD*(1)Co <sub>1</sub> -Hg              | 45.80                  |
|                                                           | BD(1)Co <sub>1</sub> -Hg              | BD*(1)Co <sub>1</sub> -O <sub>1</sub>  | 17.78                  |
|                                                           | BD (1)Co <sub>1</sub> -Hg             | BD*(1)Co <sub>1</sub> -O <sub>2</sub>  | 17.94                  |
|                                                           | BD(1)Co <sub>1</sub> -Hg              | BD*(1)Co <sub>1</sub> -O <sub>w</sub>  | 5.72                   |
| Hg-CuCo <sub>2</sub> O <sub>4</sub> N <sub>bb</sub> (110) | LP(6)Hg                               | BD*(1)Co <sub>1</sub> -N <sub>b1</sub> | 10.16                  |
|                                                           | LP(6)Hg                               | BD*(1)Co <sub>1</sub> -N <sub>b2</sub> | 9.88                   |
| Hg-CuCo <sub>2</sub> O <sub>4</sub> N <sub>bs</sub> (110) | LP(6)Hg                               | BD*(1)Co <sub>1</sub> -N <sub>b1</sub> | 18.32                  |
|                                                           | LP(6)Hg                               | BD*(1)Co <sub>1</sub> -O <sub>2</sub>  | 22.14                  |
|                                                           | LP(6)Hg                               | BD*(1)Co <sub>1</sub> -O <sub>w</sub>  | 5.53                   |
| Hg-CuCo <sub>2</sub> O <sub>4</sub> N <sub>bw</sub> (110) | LP(6)Hg                               | BD*(1)Co <sub>1</sub> -N <sub>b1</sub> | 21.58                  |
|                                                           | LP(6)Hg                               | BD*(1)Co <sub>1</sub> -O <sub>2</sub>  | 22.98                  |
|                                                           | LP(6)Hg                               | BD*(1)Co <sub>1</sub> -N <sub>w</sub>  | 7.13                   |



M1'

```
XXXXXXXXXXXXXXXXXXXXXXXXXXXXXXXXXXXXXXXXXXXXXXXXXXXXXXXXXXXXXXXXXXXXX
  x Element      Atom      Fractional coordinates of atoms  x
  x              Number      u          v          w
  x-----x
  x O           1           0.284920  0.500000  0.011360
  x O           2           0.809419  0.000314  0.147752
  x O           3           0.784920  1.000000  0.000000
  x O           4           0.291993  0.500442  0.136708
  x O           5           0.515140  0.270017  0.073102
  x O           6           0.265080  0.000000  0.011360
  x O           7           0.254934  1.000073  0.137145
  x O           8           0.765080  0.500000  0.000000
  x O           9           0.048924  0.770192  0.073204
  x O          10           0.629470  0.504389  0.209308
  x O          11           0.049370  0.230061  0.073163
  x O          12           0.514823  0.730791  0.072964
  x Co           1           0.515148  0.501426  0.140909
  x Co           2           0.025000  1.000000  0.005680
  x Co           3           0.021239  0.000316  0.137736
  x Co           4           0.525000  0.500000  0.005680
  x Co           5           0.280383  0.752410  0.074015
  x Co           6           0.280843  0.247846  0.074049
  x Cu           1           0.667246  0.000583  0.076642
  x Cu           2           0.923945  0.499948  0.057830
  x Hg           1           0.788003  0.499743  0.315108
XXXXXXXXXXXXXXXXXXXXXXXXXXXXXXXXXXXXXXXXXXXXXXXXXXXXXXXXXXXXXXXXXXXXX
```

M1

```
XXXXXXXXXXXXXXXXXXXXXXXXXXXXXXXXXXXXXXXXXXXXXXXXXXXXXXXXXXXXXXXXXXXXX
  x Element      Atom      Fractional coordinates of atoms  x
  x              Number      u          v          w
  x-----x
  x O           1           0.284920  0.500000  0.011360
  x O           2           0.807572 -0.000332  0.147845
  x O           3           0.784920  1.000000  0.000000
  x O           4           0.284271  0.499892  0.136066
  x O           5           0.513662  0.276923  0.074579
  x O           6           0.265080  0.000000  0.011360
  x O           7           0.251708  1.000059  0.137081
  x O           8           0.765080  0.500000  0.000000
  x O           9           0.047079  0.770488  0.073095
```

|   |    |    |          |           |          |
|---|----|----|----------|-----------|----------|
| x | O  | 10 | 0.576072 | 0.503923  | 0.224587 |
| x | O  | 11 | 0.047238 | 0.229678  | 0.073085 |
| x | O  | 12 | 0.513691 | 0.721232  | 0.075385 |
| x | Co | 1  | 0.506292 | 0.499068  | 0.146721 |
| x | Co | 2  | 0.025000 | 1.000000  | 0.005680 |
| x | Co | 3  | 0.019267 | 0.000189  | 0.137915 |
| x | Co | 4  | 0.525000 | 0.500000  | 0.005680 |
| x | Co | 5  | 0.278992 | 0.751638  | 0.074050 |
| x | Co | 6  | 0.279228 | 0.248300  | 0.073976 |
| x | Cu | 1  | 0.665603 | -0.000580 | 0.076429 |
| x | Cu | 2  | 0.924204 | 0.500029  | 0.057486 |
| x | Hg | 1  | 0.502147 | 0.504825  | 0.346160 |

XXXXXXXXXXXXXXXXXXXXXXXXXXXXXXXXXXXXXXXXXXXXXXXXXXXXXXXXXXXXXXXXXXXXXXXXXXXX

(Hg-O<sub>w</sub>)<sub>TS</sub>

++++  
++++

Coordinates: Fractional components

++++  
++++

| Element | Atom<br>Number | x | y | z |
|---------|----------------|---|---|---|
|---------|----------------|---|---|---|

++++  
++++

|    |    |          |          |          |
|----|----|----------|----------|----------|
| O  | 1  | 0.284919 | 0.499999 | 0.011360 |
| O  | 2  | 0.810192 | 0.000232 | 0.147246 |
| O  | 3  | 0.784918 | 0.999997 | 0.000000 |
| O  | 4  | 0.295614 | 0.500203 | 0.136270 |
| O  | 5  | 0.512455 | 0.267347 | 0.072294 |
| O  | 6  | 0.265080 | 0.000000 | 0.011360 |
| O  | 7  | 0.253021 | 1.000051 | 0.137005 |
| O  | 8  | 0.765079 | 0.499999 | 0.000000 |
| O  | 9  | 0.046351 | 0.768280 | 0.072680 |
| O  | 10 | 0.696488 | 0.502259 | 0.181143 |
| O  | 11 | 0.046590 | 0.231870 | 0.072655 |
| O  | 12 | 0.512293 | 0.733062 | 0.072223 |
| Co | 1  | 0.520356 | 0.500711 | 0.138703 |
| Co | 2  | 0.025000 | 0.999997 | 0.005680 |

|    |   |          |          |          |
|----|---|----------|----------|----------|
| Co | 3 | 0.021640 | 0.000176 | 0.137133 |
| Co | 4 | 0.524999 | 0.499999 | 0.005680 |
| Co | 5 | 0.278582 | 0.751467 | 0.073756 |
| Co | 6 | 0.278822 | 0.248654 | 0.073771 |
| Cu | 1 | 0.666310 | 0.000301 | 0.076298 |
| Cu | 2 | 0.906080 | 0.499964 | 0.066500 |
| Hg | 1 | 0.653264 | 0.499574 | 0.308654 |

+++++

(Hg-O<sub>s</sub>)<sub>TS</sub>

+++++

Coordinates: Fractional components

+++++

| Element | Atom<br>Number | x | y | z |
|---------|----------------|---|---|---|
|---------|----------------|---|---|---|

+++++

|    |    |          |           |          |
|----|----|----------|-----------|----------|
| O  | 1  | 0.284919 | 0.499999  | 0.011360 |
| O  | 2  | 0.808138 | 0.000010  | 0.146857 |
| O  | 3  | 0.784918 | 0.999997  | 0.000000 |
| O  | 4  | 0.378747 | 0.499857  | 0.193218 |
| O  | 5  | 0.507978 | 0.264735  | 0.071520 |
| O  | 6  | 0.265080 | 0.000000  | 0.011360 |
| O  | 7  | 0.248828 | 1.000008  | 0.135904 |
| O  | 8  | 0.765079 | 0.499999  | 0.000000 |
| O  | 9  | 0.043206 | 0.763498  | 0.071923 |
| O  | 10 | 0.743520 | 0.500168  | 0.145942 |
| O  | 11 | 0.043212 | 0.236504  | 0.071923 |
| O  | 12 | 0.507972 | 0.735278  | 0.071515 |
| Co | 1  | 0.531063 | 0.500031  | 0.135961 |
| Co | 2  | 0.025000 | 0.999997  | 0.005680 |
| Co | 3  | 0.018954 | -0.000001 | 0.135776 |
| Co | 4  | 0.524999 | 0.499999  | 0.005680 |
| Co | 5  | 0.276683 | 0.753010  | 0.072040 |
| Co | 6  | 0.276694 | 0.246969  | 0.072034 |

|    |   |          |           |          |
|----|---|----------|-----------|----------|
| Cu | 1 | 0.664720 | -0.000004 | 0.075546 |
| Cu | 2 | 0.887943 | 0.499998  | 0.074601 |
| Hg | 1 | 0.256847 | 0.500051  | 0.311936 |

+++++

Hg<sub>a</sub>: Hg adsorb on CuCoO<sub>4</sub>-N<sub>b</sub>(110)

XXXXXXXXXXXXXXXXXXXXXXXXXXXXXXXXXXXXXXXXXXXXXXXXXXXXXXXXXXXXXXXXXXXX

| x       | Element | Atom   | Fractional coordinates of atoms |           |          | x |
|---------|---------|--------|---------------------------------|-----------|----------|---|
| x       |         | Number | u                               | v         | w        |   |
| x-----x |         |        |                                 |           |          |   |
| x       | N       | 1      | 0.512916                        | 0.261366  | 0.066352 |   |
| x       | O       | 1      | 0.284920                        | 0.500000  | 0.011360 |   |
| x       | O       | 2      | 0.811049                        | -0.031685 | 0.146826 |   |
| x       | O       | 3      | 0.784920                        | 1.000000  | 0.000000 |   |
| x       | O       | 4      | 0.293871                        | 0.502012  | 0.136325 |   |
| x       | O       | 5      | 0.265080                        | 0.000000  | 0.011360 |   |
| x       | O       | 6      | 0.250801                        | 1.000871  | 0.136345 |   |
| x       | O       | 7      | 0.765080                        | 0.500000  | 0.000000 |   |
| x       | O       | 8      | 0.043335                        | 0.765104  | 0.071462 |   |
| x       | O       | 9      | 0.737954                        | 0.481876  | 0.144719 |   |
| x       | O       | 10     | 0.038192                        | 0.232316  | 0.071833 |   |
| x       | O       | 11     | 0.508473                        | 0.724564  | 0.072818 |   |
| x       | Co      | 1      | 0.525132                        | 0.477107  | 0.134810 |   |
| x       | Co      | 2      | 0.025000                        | 1.000000  | 0.005680 |   |
| x       | Co      | 3      | 0.021815                        | -0.001093 | 0.135927 |   |
| x       | Co      | 4      | 0.525000                        | 0.500000  | 0.005680 |   |
| x       | Co      | 5      | 0.275711                        | 0.748152  | 0.073470 |   |
| x       | Co      | 6      | 0.287104                        | 0.248342  | 0.073722 |   |
| x       | Cu      | 1      | 0.668335                        | 0.026483  | 0.078389 |   |
| x       | Cu      | 2      | 0.885620                        | 0.497768  | 0.075010 |   |
| x       | Hg      | 1      | 0.520671                        | 0.454679  | 0.276818 |   |

XXXXXXXXXXXXXXXXXXXXXXXXXXXXXXXXXXXXXXXXXXXXXXXXXXXXXXXXXXXXXXXXXXXX

M2

XXXXXXXXXXXXXXXXXXXXXXXXXXXXXXXXXXXXXXXXXXXXXXXXXXXXXXXXXXXXXXXXXXXX

| x       | Element | Atom   | Fractional coordinates of atoms |          |          | x |
|---------|---------|--------|---------------------------------|----------|----------|---|
| x       |         | Number | u                               | v        | w        |   |
| x-----x |         |        |                                 |          |          |   |
| x       | N       | 1      | 0.514552                        | 0.266510 | 0.069663 |   |

|   |    |    |          |           |          |
|---|----|----|----------|-----------|----------|
| x | O  | 1  | 0.284920 | 0.500000  | 0.011360 |
| x | O  | 2  | 0.812301 | -0.032702 | 0.147144 |
| x | O  | 3  | 0.784920 | 1.000000  | 0.000000 |
| x | O  | 4  | 0.290134 | 0.501229  | 0.136809 |
| x | O  | 5  | 0.265080 | 0.000000  | 0.011360 |
| x | O  | 6  | 0.254674 | 1.002362  | 0.136552 |
| x | O  | 7  | 0.765080 | 0.500000  | 0.000000 |
| x | O  | 8  | 0.050256 | 0.770307  | 0.072540 |
| x | O  | 9  | 0.630016 | 0.482187  | 0.206668 |
| x | O  | 10 | 0.040811 | 0.229499  | 0.073154 |
| x | O  | 11 | 0.514176 | 0.722076  | 0.073309 |
| x | Co | 1  | 0.513844 | 0.484488  | 0.138616 |
| x | Co | 2  | 0.025000 | 1.000000  | 0.005680 |
| x | Co | 3  | 0.023544 | -0.001475 | 0.137573 |
| x | Co | 4  | 0.525000 | 0.500000  | 0.005680 |
| x | Co | 5  | 0.281123 | 0.750944  | 0.074080 |
| x | Co | 6  | 0.286848 | 0.247742  | 0.073168 |
| x | Cu | 1  | 0.671627 | 0.033433  | 0.079118 |
| x | Cu | 2  | 0.921460 | 0.502712  | 0.059269 |
| x | Hg | 1  | 0.784564 | 0.453071  | 0.317251 |

XXXXXXXXXXXXXXXXXXXXXXXXXXXXXXXXXXXXXXXXXXXXXXXXXXXXXXXXXXXXXXXXXXXX

TS(Hg-O<sub>w</sub>)<sub>N</sub>

++++  
++++

Coordinates: Fractional components

++++  
++++

| Element | Atom Number | x | y | z |
|---------|-------------|---|---|---|
|---------|-------------|---|---|---|

++++  
++++

|   |   |          |           |          |
|---|---|----------|-----------|----------|
| N | 1 | 0.514038 | 0.263956  | 0.068103 |
| O | 1 | 0.284919 | 0.499999  | 0.011360 |
| O | 2 | 0.812812 | -0.031710 | 0.147006 |
| O | 3 | 0.784918 | 0.999997  | 0.000000 |
| O | 4 | 0.291351 | 0.501699  | 0.136693 |
| O | 5 | 0.265080 | 0.000000  | 0.011360 |
| O | 6 | 0.253808 | 1.001575  | 0.136621 |



|    |    |          |           |          |
|----|----|----------|-----------|----------|
| O  | 7  | 0.765079 | 0.499999  | 0.000000 |
| O  | 8  | 0.047466 | 0.768440  | 0.072133 |
| O  | 9  | 0.692912 | 0.482533  | 0.179660 |
| O  | 10 | 0.040161 | 0.230261  | 0.072610 |
| O  | 11 | 0.511635 | 0.723585  | 0.073045 |
| Co | 1  | 0.517032 | 0.480827  | 0.136501 |
| Co | 2  | 0.025000 | 0.999997  | 0.005680 |
| Co | 3  | 0.023697 | -0.001254 | 0.137026 |
| Co | 4  | 0.524999 | 0.499999  | 0.005680 |
| Co | 5  | 0.278871 | 0.749717  | 0.073849 |
| Co | 6  | 0.287174 | 0.247952  | 0.073439 |
| Cu | 1  | 0.670438 | 0.030029  | 0.078966 |
| Cu | 2  | 0.904117 | 0.500541  | 0.067509 |
| Hg | 1  | 0.648967 | 0.451090  | 0.310132 |

+++++

H<sub>a</sub>: Hg adsorb on CuCoO<sub>4</sub>-N<sub>bb</sub>(110)

XXXXXXXXXXXXXXXXXXXXXXXXXXXXXXXXXXXXXXXXXXXXXXXXXXXXXXXXXXXXXXXXXXXX

| x | Element | Atom<br>Number | Fractional coordinates of atoms |          |          |
|---|---------|----------------|---------------------------------|----------|----------|
|   |         |                | u                               | v        | w        |
| x | N       | 1              | 0.513729                        | 0.273489 | 0.071497 |
| x | N       | 2              | 0.513725                        | 0.726523 | 0.071492 |
| x | O       | 1              | 0.284920                        | 0.500000 | 0.011360 |
| x | O       | 2              | 0.805587                        | 0.000007 | 0.148032 |
| x | O       | 3              | 0.784920                        | 1.000000 | 0.000000 |
| x | O       | 4              | 0.304628                        | 0.499996 | 0.136073 |
| x | O       | 5              | 0.265080                        | 0.000000 | 0.011360 |
| x | O       | 6              | 0.247662                        | 1.000000 | 0.136635 |
| x | O       | 7              | 0.765080                        | 0.500000 | 0.000000 |
| x | O       | 8              | 0.037756                        | 0.766288 | 0.071418 |
| x | O       | 9              | 0.749763                        | 0.500024 | 0.145912 |
| x | O       | 10             | 0.037755                        | 0.233704 | 0.071418 |
| x | Co      | 1              | 0.537062                        | 0.500016 | 0.135965 |
| x | Co      | 2              | 0.025000                        | 1.000000 | 0.005680 |
| x | Co      | 3              | 0.015895                        | 0.000000 | 0.134132 |
| x | Co      | 4              | 0.525000                        | 0.500000 | 0.005680 |
| x | Co      | 5              | 0.287158                        | 0.753535 | 0.073518 |
| x | Co      | 6              | 0.287162                        | 0.246462 | 0.073518 |
| x | Cu      | 1              | 0.655762                        | 0.000007 | 0.075079 |
| x | Cu      | 2              | 0.888656                        | 0.499999 | 0.073791 |

x Hg 1 0.529227 0.500050 0.280448

XXXXXXXXXXXXXXXXXXXXXXXXXXXXXXXXXXXXXXXXXXXXXXXXXXXXXXXXXXXXXXXXXXXXXXXXXXXX

M3

XXXXXXXXXXXXXXXXXXXXXXXXXXXXXXXXXXXXXXXXXXXXXXXXXXXXXXXXXXXXXXXXXXXXXXXXXXXX

| x | Element | Atom   | Fractional coordinates of atoms |           |          | x |
|---|---------|--------|---------------------------------|-----------|----------|---|
| x |         | Number | u                               | v         | w        |   |
| x | N       | 1      | 0.516405                        | 0.269191  | 0.071498 |   |
| x | N       | 2      | 0.516151                        | 0.730613  | 0.071444 |   |
| x | O       | 1      | 0.284920                        | 0.500000  | 0.011360 |   |
| x | O       | 2      | 0.810253                        | -0.000120 | 0.147195 |   |
| x | O       | 3      | 0.784920                        | 1.000000  | 0.000000 |   |
| x | O       | 4      | 0.292401                        | 0.499936  | 0.137118 |   |
| x | O       | 5      | 0.265080                        | 0.000000  | 0.011360 |   |
| x | O       | 6      | 0.253324                        | 0.999836  | 0.136324 |   |
| x | O       | 7      | 0.765080                        | 0.500000  | 0.000000 |   |
| x | O       | 8      | 0.042246                        | 0.770439  | 0.072729 |   |
| x | O       | 9      | 0.647454                        | 0.504465  | 0.199802 |   |
| x | O       | 10     | 0.042333                        | 0.229256  | 0.072743 |   |
| x | Co      | 1      | 0.517299                        | 0.500300  | 0.136158 |   |
| x | Co      | 2      | 0.025000                        | 1.000000  | 0.005680 |   |
| x | Co      | 3      | 0.021215                        | -0.000202 | 0.136962 |   |
| x | Co      | 4      | 0.525000                        | 0.500000  | 0.005680 |   |
| x | Co      | 5      | 0.287782                        | 0.751413  | 0.073564 |   |
| x | Co      | 6      | 0.288045                        | 0.248463  | 0.073586 |   |
| x | Cu      | 1      | 0.660833                        | -0.000256 | 0.076761 |   |
| x | Cu      | 2      | 0.923049                        | 0.499776  | 0.058177 |   |
| x | Hg      | 1      | 0.773821                        | 0.499847  | 0.321069 |   |

XXXXXXXXXXXXXXXXXXXXXXXXXXXXXXXXXXXXXXXXXXXXXXXXXXXXXXXXXXXXXXXXXXXXXXXXXXXX

TS(Hg-O<sub>w</sub>)<sub>2N</sub>

++++  
+++++

Coordinates: Fractional components

```

+++++
+++++
Element      Atom
             Number      x          y          z
+++++
N            1            0.515515  0.270736  0.071336
N            2            0.515366  0.729132  0.071310
O            1            0.284919  0.499999  0.011360
O            2            0.809119 -0.000009  0.147362
O            3            0.784918  0.999997  0.000000
O            4            0.297042  0.499960  0.136870
O            5            0.265080  0.000000  0.011360
O            6            0.251763  0.999900  0.136559
O            7            0.765079  0.499999  0.000000
O            8            0.041026  0.769202  0.072235
O            9            0.697080  0.502582  0.180333
O           10            0.041076  0.230629  0.072239
Co           1            0.523603  0.500161  0.135786
Co           2            0.025000  0.999997  0.005680
Co           3            0.019686 -0.000105  0.135986
Co           4            0.524999  0.499999  0.005680
Co           5            0.287813  0.752355  0.073598
Co           6            0.287964  0.247567  0.073610
Cu           1            0.658999 -0.000156  0.076069
Cu           2            0.909351  0.499873  0.064821
Hg           1            0.671510  0.499740  0.314964
+++++
+++++

```

H<sub>a</sub>: Hg adsorb on CuCoO<sub>4</sub>-N<sub>bbs</sub>(110)

XXXXXXXXXXXXXXXXXXXXXXXXXXXXXXXXXXXXXXXXXXXXXXXXXXXXXXXXXXXXXXXXXXXX

| x | Element | Atom   | Fractional coordinates of atoms |          |          |
|---|---------|--------|---------------------------------|----------|----------|
| x |         | Number | u                               | v        | w        |
| x | N       | 1      | 0.510648                        | 0.265495 | 0.067703 |
| x | N       | 2      | 0.510675                        | 0.734457 | 0.067723 |
| x | N       | 3      | 0.276534                        | 0.499992 | 0.138802 |

|   |    |   |          |           |          |
|---|----|---|----------|-----------|----------|
| x | O  | 1 | 0.284920 | 0.500000  | 0.011360 |
| x | O  | 2 | 0.805129 | -0.000013 | 0.146050 |
| x | O  | 3 | 0.784920 | 1.000000  | 0.000000 |
| x | O  | 4 | 0.265080 | 0.000000  | 0.011360 |
| x | O  | 5 | 0.246172 | 0.999992  | 0.136913 |
| x | O  | 6 | 0.765080 | 0.500000  | 0.000000 |
| x | O  | 7 | 0.035509 | 0.765263  | 0.071052 |
| x | O  | 8 | 0.721609 | 0.499778  | 0.145835 |
| x | O  | 9 | 0.035524 | 0.234735  | 0.071051 |
| x | Co | 1 | 0.506308 | 0.499919  | 0.131523 |
| x | Co | 2 | 0.025000 | 1.000000  | 0.005680 |
| x | Co | 3 | 0.016381 | -0.000008 | 0.134387 |
| x | Co | 4 | 0.525000 | 0.500000  | 0.005680 |
| x | Co | 5 | 0.285006 | 0.743319  | 0.076990 |
| x | Co | 6 | 0.284995 | 0.256684  | 0.076991 |
| x | Cu | 1 | 0.655900 | 0.000014  | 0.074326 |
| x | Cu | 2 | 0.876465 | 0.500043  | 0.077703 |
| x | Hg | 1 | 0.498539 | 0.499969  | 0.275667 |

XXXXXXXXXXXXXXXXXXXXXXXXXXXXXXXXXXXXXXXXXXXXXXXXXXXXXXXXXXXXXXXXXXXXXXXXXXXX

M4

XXXXXXXXXXXXXXXXXXXXXXXXXXXXXXXXXXXXXXXXXXXXXXXXXXXXXXXXXXXXXXXXXXXXXXXXXXXX

| x | Element | Atom   | Fractional coordinates of atoms |           |          | x |
|---|---------|--------|---------------------------------|-----------|----------|---|
| x |         | Number | u                               | v         | w        |   |
| x | N       | 1      | 0.514177                        | 0.271672  | 0.070754 |   |
| x | N       | 2      | 0.514222                        | 0.725242  | 0.071622 |   |
| x | N       | 3      | 0.271106                        | 0.499075  | 0.139187 |   |
| x | O       | 1      | 0.284920                        | 0.500000  | 0.011360 |   |
| x | O       | 2      | 0.808894                        | -0.001278 | 0.147127 |   |
| x | O       | 3      | 0.784920                        | 1.000000  | 0.000000 |   |
| x | O       | 4      | 0.265080                        | 0.000000  | 0.011360 |   |
| x | O       | 5      | 0.250794                        | 0.999640  | 0.136426 |   |
| x | O       | 6      | 0.765080                        | 0.500000  | 0.000000 |   |
| x | O       | 7      | 0.039068                        | 0.770403  | 0.072503 |   |
| x | O       | 8      | 0.630587                        | 0.494305  | 0.198136 |   |
| x | O       | 9      | 0.038979                        | 0.229466  | 0.072611 |   |
| x | Co      | 1      | 0.489996                        | 0.496327  | 0.137479 |   |
| x | Co      | 2      | 0.025000                        | 1.000000  | 0.005680 |   |
| x | Co      | 3      | 0.020290                        | -0.000208 | 0.137043 |   |
